# Supplementary material for: Impact of cancer-associated mutations in Hsh155/SF3b1 HEAT repeats 9-12 on pre-mRNA splicing in Saccharomyces cerevisiae
Source: PubMed Central journal article supplement (PMC7176370; doi:10.1371/journal.pone.0229315), 2020-04-22
Supplement: pone.0229315.s001.pdf [file pone.0229315.s001.pdf]

**BS A258U**

**BS U257C**

**BS A258U**

D563G  
E529K  
V502F  
WT

D563G  
D563G  
E529K  
V502F  
WT  
WT

D563G  
D563G  
E529K  
V502F  
WT

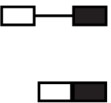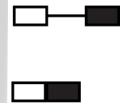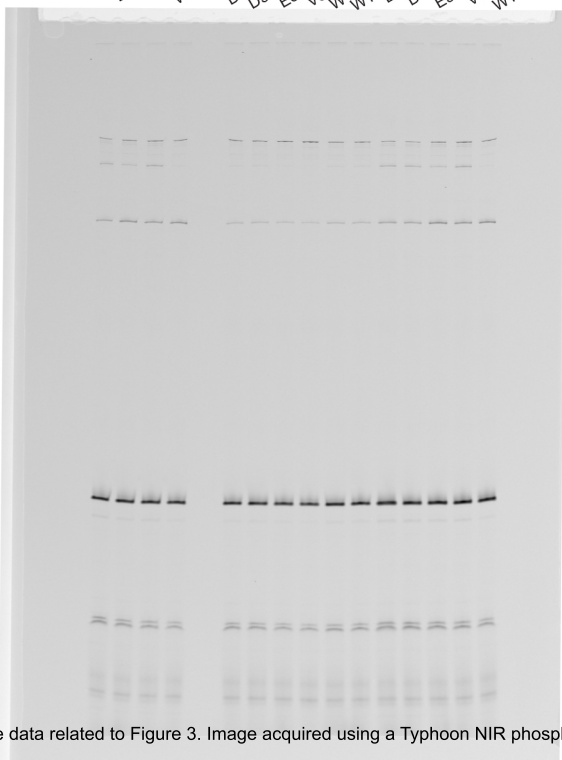

U6

U6

**BS A258U**                      **BS WT**                      **BS A258U**

V502F    WT    D563G    E529K    V502F    WT    D563G    E529K    V502F    WT    D563G    E529K    V502F    WT

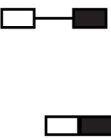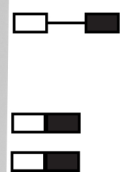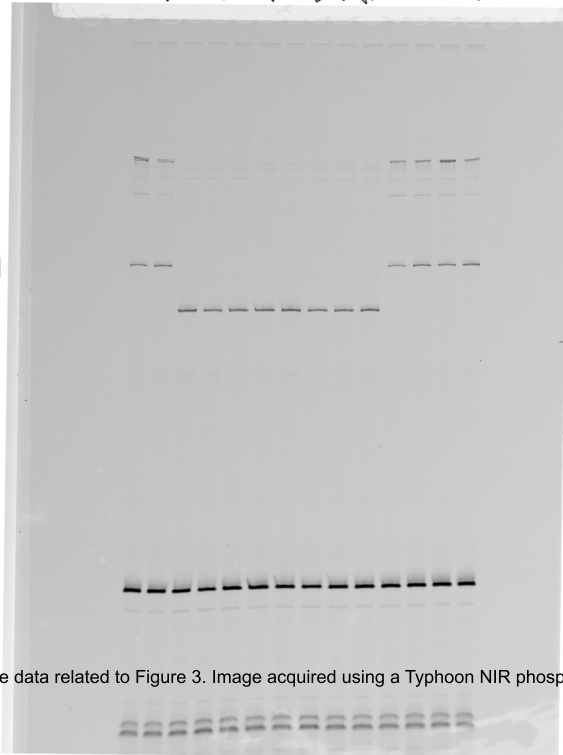

U6

U6

Raw image data related to Figure 3. Image acquired using a Typhoon NIR phosphorimager.
