# Supplementary material for: Impact of cancer-associated mutations in Hsh155/SF3b1 HEAT repeats 9-12 on pre-mRNA splicing in Saccharomyces cerevisiae
Source: PubMed Central journal article supplement (PMC7176370; doi:10.1371/journal.pone.0229315), 2020-04-22
Supplement: pone.0229315.s002.pdf [file pone.0229315.s002.pdf]

**S1 Table. Yeast strains used in this study.**

| Name     | Genotype                                                                                               | Description                                                                                                                         |
|----------|--------------------------------------------------------------------------------------------------------|-------------------------------------------------------------------------------------------------------------------------------------|
| yAAH0418 | MATa prc1407 prb11122 pep43 leu2 trp1 ura352 gal2, hsh155::KanMx, pRS416-Hsh155 <sup>WT</sup>          | Strain used to generate HSH155 mutants by plasmid shuffle.                                                                          |
| yAAH0424 | MATa prc1407 prb11122 pep43 leu2 trp1 ura352 gal2, hsh155::KanMx, pRS414-Hsh155 <sup>WT</sup>          | Strain expressing Hsh155 <sup>WT</sup> . Used for temperature assay.                                                                |
| yAAH2151 | MATa prc1407 prb11122 pep43 leu2 trp1 ura352 gal2, hsh155::KanMx, pRS414-Hsh155 <sup>V502F</sup>       | Strain expressing Hsh155 <sup>V502F</sup> . Used for temperature assay.                                                             |
| yAAH1971 | MATa prc1407 prb11122 pep43 leu2 trp1 ura352 gal2, hsh155::KanMx, pRS414-Hsh155 <sup>E529K</sup>       | Strain expressing Hsh155 <sup>E529K</sup> . Used for temperature assay.                                                             |
| yAAH2152 | MATa prc1407 prb11122 pep43 leu2 trp1 ura352 gal2, hsh155::KanMx, pRS414-Hsh155 <sup>E531K</sup>       | Strain expressing Hsh155 <sup>E531K</sup> . Used for temperature assay.                                                             |
| yAAH1922 | MATa prc1407 prb11122 pep43 leu2 trp1 ura352 gal2, hsh155::KanMx, pRS414-Hsh155 <sup>D563G</sup>       | Strain expressing Hsh155 <sup>D563G</sup> . Used for temperature assay.                                                             |
| yAAH2149 | MATa prc1407 prb11122 pep43 leu2 trp1 ura352 gal2, hsh155::KanMx, pRS414-Hsh155 <sup>E571G</sup>       | Strain expressing Hsh155 <sup>E571G</sup> . Used for temperature assay.                                                             |
| yAAH2150 | MATa prc1407 prb11122 pep43 leu2 trp1 ura352 gal2, hsh155::KanMx, pRS414-Hsh155 <sup>E571K</sup>       | Strain expressing Hsh155 <sup>E571K</sup> . Used for temperature assay.                                                             |
| yAAH2153 | MATa prc1407 prb11122 pep43 leu2 trp1 ura352 gal2, hsh155::KanMx, pRS414-Hsh155 <sup>I626Q</sup>       | Strain expressing Hsh155 <sup>I626Q</sup> . Used for temperature assay.                                                             |
| yAAH0465 | MAT $\alpha$ cup1 $\Delta$ ura3 his3 trp1 lys2 ade2 leu2 Hsh155::KanMx, pRS416-Hsh155 <sup>WT</sup>    | Copper sensitive strain used to generate HSH155 mutants for ACT1-CUP1 by plasmid shuffle. Hsh155 was deleted using KanMax cassette. |
| yAAH0648 | MAT $\alpha$ cup1 $\Delta$ ura3 his3 trp1 lys2 ade2 leu2 Hsh155::KanMx, pRS414-Hsh155 <sup>WT</sup>    | Copper sensitive strain expressing Hsh155 <sup>WT</sup> . Used for ACT1-CUP1 assay after transformation with reporter plasmids.     |
| yAAH2156 | MAT $\alpha$ cup1 $\Delta$ ura3 his3 trp1 lys2 ade2 leu2 Hsh155::KanMx, pRS414-Hsh155 <sup>V502F</sup> | Copper sensitive strain expressing Hsh155 <sup>V502F</sup> . Used for ACT1-CUP1 assay after transformation with reporter plasmids.  |
| yAAH1999 | MAT $\alpha$ cup1 $\Delta$ ura3 his3 trp1 lys2 ade2 leu2 Hsh155::KanMx, pRS414-Hsh155 <sup>E529K</sup> | Copper sensitive strain expressing Hsh155 <sup>E529K</sup> . Used for ACT1-CUP1 assay after transformation with reporter plasmids.  |
| yAAH2157 | MAT $\alpha$ cup1 $\Delta$ ura3 his3 trp1 lys2 ade2 leu2 Hsh155::KanMx, pRS414-Hsh155 <sup>E531K</sup> | Copper sensitive strain expressing Hsh155 <sup>E531K</sup> . Used for ACT1-CUP1 assay after transformation with reporter plasmids.  |
| yAAH1921 | MAT $\alpha$ cup1 $\Delta$ ura3 his3 trp1 lys2 ade2 leu2 Hsh155::KanMx, pRS414-Hsh155 <sup>D563G</sup> | Copper sensitive strain expressing Hsh155 <sup>D563G</sup> . Used for ACT1-CUP1 assay after transformation with reporter plasmids.  |
| yAAH2154 | MAT $\alpha$ cup1 $\Delta$ ura3 his3 trp1 lys2 ade2 leu2 Hsh155::KanMx, pRS414-Hsh155 <sup>E571G</sup> | Copper sensitive strain expressing Hsh155 <sup>E571G</sup> . Used for ACT1-CUP1 assay after transformation with reporter plasmids.  |
| yAAH2155 | MAT $\alpha$ cup1 $\Delta$ ura3 his3 trp1 lys2 ade2 leu2 Hsh155::KanMx, pRS414-Hsh155 <sup>E571K</sup> | Copper sensitive strain expressing Hsh155 <sup>E571K</sup> . Used for ACT1-CUP1 assay after transformation with reporter plasmids.  |

|          |                                                                                                                                                    |                                                                                                                                          |
|----------|----------------------------------------------------------------------------------------------------------------------------------------------------|------------------------------------------------------------------------------------------------------------------------------------------|
| yAAH2158 | MAT $\alpha$ cup1 $\Delta$ ura3 his3 trp1 lys2 ade2 leu2<br>Hsh155::KanMx, pRS414-Hsh155 <sup>I626Q</sup>                                          | Copper sensitive strain expressing Hsh155 <sup>I626Q</sup> . Used for ACT1-CUP1 assay after transformation with reporter plasmids.       |
| yAAH0650 | MAT $\alpha$ cup1 $\Delta$ ura3 his3 trp1 lys2 ade2 leu2<br>Hsh155::KanMx, pRS414-Hsh155 <sup>H331D</sup>                                          | Copper sensitive strain expressing Hsh155 <sup>H331D</sup> . Used for ACT1-CUP1 assay after transformation with reporter plasmids.       |
| yAAH0635 | MAT $\alpha$ cup1 $\Delta$ ura3 his3 trp1 lys2 ade2 leu2<br>Hsh155::KanMx, pRS414-Hsh155 <sup>D450G</sup>                                          | Copper sensitive strain expressing Hsh155 <sup>D450G</sup> . Used for ACT1-CUP1 assay after transformation with reporter plasmids.       |
| yTJC0298 | MAT $\alpha$ cup1 $\Delta$ ura3 his3 trp1 lys2 ade2 leu2<br>Hsh155::KanMx, pRS414-Hsh155 <sup>K740R</sup>                                          | Copper sensitive strain expressing Hsh155 <sup>K740R</sup> . Used for ACT1-CUP1 assay after transformation with reporter plasmids.       |
| yTJC0300 | MAT $\alpha$ cup1 $\Delta$ ura3 his3 trp1 lys2 ade2 leu2<br>Hsh155::KanMx, pRS414-Hsh155 <sup>N747A</sup>                                          | Copper sensitive strain expressing Hsh155 <sup>N747A</sup> . Used for ACT1-CUP1 assay after transformation with reporter plasmids.       |
| yAAH2237 | MAT $\alpha$ cup1 $\Delta$ ura3 his3 trp1 lys2 ade2 leu2<br>Hsh155::KanMx, pRS414-Hsh155 <sup>H331D/V502F</sup>                                    | Copper sensitive strain expressing Hsh155 <sup>H331D/V502F</sup> . Used for ACT1-CUP1 assay after transformation with reporter plasmids. |
| yAAH2236 | MAT $\alpha$ cup1 $\Delta$ ura3 his3 trp1 lys2 ade2 leu2<br>Hsh155::KanMx, pRS414-Hsh155 <sup>D450G/V502F</sup>                                    | Copper sensitive strain expressing Hsh155 <sup>D450G/V502F</sup> . Used for ACT1-CUP1 assay after transformation with reporter plasmids. |
| yAAH2238 | MAT $\alpha$ cup1 $\Delta$ ura3 his3 trp1 lys2 ade2 leu2<br>Hsh155::KanMx, pRS414-Hsh155 <sup>K740R/V502F</sup>                                    | Copper sensitive strain expressing Hsh155 <sup>K740R/V502F</sup> . Used for ACT1-CUP1 assay after transformation with reporter plasmids. |
| yAAH2239 | MAT $\alpha$ cup1 $\Delta$ ura3 his3 trp1 lys2 ade2 leu2<br>Hsh155::KanMx, pRS414-Hsh155 <sup>N747A/V502F</sup>                                    | Copper sensitive strain expressing Hsh155 <sup>N747A/V502F</sup> . Used for ACT1-CUP1 assay after transformation with reporter plasmids. |
| yAAH2214 | MAT $\alpha$ cup1 $\Delta$ ura3 his3 trp1 lys2 ade2 leu2<br>Hsh155::KanMx, pRS416-Hsh155 <sup>WT</sup> prp2::hphMX<br>pRS415-Prp2 <sup>WT</sup>    | Used to generate Hsh155 mutants strains by plasmid shuffle. Prp2 was deleted using an hphMX deletion cassette.                           |
| yAAH2214 | MAT $\alpha$ cup1 $\Delta$ ura3 his3 trp1 lys2 ade2 leu2<br>Hsh155::KanMx, pRS416-Hsh155 <sup>WT</sup> prp2::hphMX<br>pRS415-Prp2 <sup>Q548N</sup> | Used to generate Hsh155 alleles by plasmid shuffle. Prp2 was deleted using an hphMX deletion cassette.                                   |
| yAAH1915 | MAT $\alpha$ cup1 $\Delta$ ura3 his3 trp1 lys2 ade2 leu2<br>Hsh155::KanMx, pRS414-Hsh155 <sup>WT</sup> prp2::hphMX<br>pRS415-Prp2 <sup>WT</sup>    | Copper sensitive strain expressing Hsh155 <sup>WT</sup> and Prp2 <sup>WT</sup> from plasmids. Used for temperature assays.               |
| yAAH2221 | MAT $\alpha$ cup1 $\Delta$ ura3 his3 trp1 lys2 ade2 leu2<br>Hsh155::KanMx, pRS414-Hsh155 <sup>V502F</sup> prp2::hphMX<br>pRS415-Prp2 <sup>WT</sup> | Copper sensitive strain expressing Hsh155 <sup>V502F</sup> and Prp2 <sup>WT</sup> from plasmids. Used for temperature assays.            |
| yAAH2222 | MAT $\alpha$ cup1 $\Delta$ ura3 his3 trp1 lys2 ade2 leu2<br>Hsh155::KanMx, pRS414-Hsh155 <sup>E529K</sup> prp2::hphMX<br>pRS415-Prp2 <sup>WT</sup> | Copper sensitive strain expressing Hsh155 <sup>E529K</sup> and Prp2 <sup>WT</sup> from plasmids. Used for temperature assays.            |
| yAAH2219 | MAT $\alpha$ cup1 $\Delta$ ura3 his3 trp1 lys2 ade2 leu2<br>Hsh155::KanMx, pRS414-Hsh155 <sup>E531K</sup> prp2::hphMX<br>pRS415-Prp2 <sup>WT</sup> | Copper sensitive strain expressing Hsh155 <sup>E531K</sup> and Prp2 <sup>WT</sup> from plasmids. Used for temperature assays.            |
| yAAH1964 | MAT $\alpha$ cup1 $\Delta$ ura3 his3 trp1 lys2 ade2 leu2                                                                                           | Copper sensitive strain expressing Hsh155 <sup>D563G</sup> and Prp2 <sup>WT</sup> from plasmids. Used for temperature assays.            |

|             |                                                                                                                                                                                            |                                                                                                                                  |
|-------------|--------------------------------------------------------------------------------------------------------------------------------------------------------------------------------------------|----------------------------------------------------------------------------------------------------------------------------------|
|             | Hsh155::KanMx, pRS414-Hsh155 <sup>D563G</sup> prp2::hphMX<br>pRS415-Prp2 <sup>WT</sup>                                                                                                     |                                                                                                                                  |
| yAAH2218    | MAT $\alpha$ cup1 $\Delta$ ura3 his3 trp1 lys2 ade2 leu2<br>Hsh155::KanMx, pRS414-Hsh155 <sup>E571G</sup> prp2::hphMX<br>pRS415-Prp2 <sup>WT</sup>                                         | Copper sensitive strain expressing Hsh155 <sup>E571G</sup> and Prp2 <sup>WT</sup> from plasmids. Used for temperature assays.    |
| yAAH2217    | MAT $\alpha$ cup1 $\Delta$ ura3 his3 trp1 lys2 ade2 leu2<br>Hsh155::KanMx, pRS414-Hsh155 <sup>E571K</sup> prp2::hphMX<br>pRS415-Prp2 <sup>WT</sup>                                         | Copper sensitive strain expressing Hsh155 <sup>E571K</sup> and Prp2 <sup>WT</sup> from plasmids. Used for temperature assays.    |
| yAAH2220    | MAT $\alpha$ cup1 $\Delta$ ura3 his3 trp1 lys2 ade2 leu2<br>Hsh155::KanMx, pRS414-Hsh155 <sup>I626Q</sup> prp2::hphMX<br>pRS415-Prp2 <sup>WT</sup>                                         | Copper sensitive strain expressing Hsh155 <sup>I626Q</sup> and Prp2 <sup>WT</sup> from plasmids. Used for temperature assays.    |
| yAAH1916    | MAT $\alpha$ cup1 $\Delta$ ura3 his3 trp1 lys2 ade2 leu2<br>Hsh155::KanMx, pRS414-Hsh155 <sup>WT</sup> prp2::hphMX<br>pRS415-Prp2 <sup>Q548N</sup>                                         | Copper sensitive strain expressing Hsh155 <sup>WT</sup> and Prp2 <sup>Q584N</sup> from plasmids. Used for temperature assays.    |
| yAAH2224    | MAT $\alpha$ cup1 $\Delta$ ura3 his3 trp1 lys2 ade2 leu2<br>Hsh155::KanMx, pRS414-Hsh155 <sup>V502F</sup> prp2::hphMX<br>pRS415-Prp2 <sup>Q548N</sup>                                      | Copper sensitive strain expressing Hsh155 <sup>V502F</sup> and Prp2 <sup>Q584N</sup> from plasmids. Used for temperature assays. |
| yAAH2223    | MAT $\alpha$ cup1 $\Delta$ ura3 his3 trp1 lys2 ade2 leu2<br>Hsh155::KanMx, pRS414-Hsh155 <sup>E529K</sup> prp2::hphMX<br>pRS415-Prp2 <sup>Q548N</sup>                                      | Copper sensitive strain expressing Hsh155 <sup>E529K</sup> and Prp2 <sup>Q584N</sup> from plasmids. Used for temperature assays. |
| yAAH2226    | MAT $\alpha$ cup1 $\Delta$ ura3 his3 trp1 lys2 ade2 leu2<br>Hsh155::KanMx, pRS414-Hsh155 <sup>E531K</sup> prp2::hphMX<br>pRS415-Prp2 <sup>Q548N</sup>                                      | Copper sensitive strain expressing Hsh155 <sup>E531K</sup> and Prp2 <sup>Q584N</sup> from plasmids. Used for temperature assays. |
| yAAH1963    | MAT $\alpha$ cup1 $\Delta$ ura3 his3 trp1 lys2 ade2 leu2<br>Hsh155::KanMx, pRS414-Hsh155 <sup>D563G</sup> prp2::hphMX<br>pRS415-Prp2 <sup>Q548N</sup>                                      | Copper sensitive strain expressing Hsh155 <sup>D563G</sup> and Prp2 <sup>Q584N</sup> from plasmids. Used for temperature assays. |
| yAAH2227    | MAT $\alpha$ cup1 $\Delta$ ura3 his3 trp1 lys2 ade2 leu2<br>Hsh155::KanMx, pRS416-Hsh155 <sup>E571G</sup> prp2::hphMX<br>pRS415-Prp2 <sup>Q548N</sup>                                      | Copper sensitive strain expressing Hsh155 <sup>E571G</sup> and Prp2 <sup>Q584N</sup> from plasmids. Used for temperature assays. |
| yAAH2228    | MAT $\alpha$ cup1 $\Delta$ ura3 his3 trp1 lys2 ade2 leu2<br>Hsh155::KanMx, pRS416-Hsh155 <sup>E571K</sup> prp2::hphMX<br>pRS415-Prp2 <sup>Q548N</sup>                                      | Copper sensitive strain expressing Hsh155 <sup>E571K</sup> and Prp2 <sup>Q584N</sup> from plasmids. Used for temperature assays. |
| yAAH2225    | MAT $\alpha$ cup1 $\Delta$ ura3 his3 trp1 lys2 ade2 leu2<br>Hsh155::KanMx, pRS416-Hsh155 <sup>I626Q</sup> prp2::hphMX<br>pRS415-Prp2 <sup>Q548N</sup>                                      | Copper sensitive strain expressing Hsh155 <sup>I626Q</sup> and Prp2 <sup>Q584N</sup> from plasmids. Used for temperature assays. |
| Y2H<br>GOLD | MAT $\alpha$ , trp1-901, leu2-3, 112, ura3-52, his3-<br>200, gal4 $\Delta$ , gal80 $\Delta$ , LYS2::GAL1UAS-<br>Gal1TATA-His3, GAL2UAS-Gal2TATA-Ade2<br>URA3::MEL1UAS-Mel1TATA AUR1-C MEL1 | Strain used to test interactions by Y2H (Clontech).                                                                              |

|          |                                                                                                                                                      |                                                                                                                                |
|----------|------------------------------------------------------------------------------------------------------------------------------------------------------|--------------------------------------------------------------------------------------------------------------------------------|
| yAAH0595 | MATa, trp1-901, leu2-3, 112, ura3-52, his3-200, gal4Δ, gal80Δ, LYS2::GAL1UAS-Gal1TATA-His3, GAL2UAS-Gal2TATA-Ade2 URA3::MEL1UAS-Mel1TATA AUR1-C MEL1 | Strain used as negative control for Y2H assay ((AD HSH155 <sup>WT</sup> ; BD Empty)                                            |
| yAAH2329 | MATa, trp1-901, leu2-3, 112, ura3-52, his3-200, gal4Δ, gal80Δ, LUS2: :GAL1UAS-Gal1TATA-His3, GAL2UAS-Gal2TATA-Ade URA3: :MEL1UAS-Mel1TATA AUR1-C     | Strain used to test the interaction between HSH155 WT and PRP5 using Y2H assay                                                 |
| yAAH2330 | MATa, trp1-901, leu2-3, 112, ura3-52, his3-200, gal4Δ, gal80Δ, LUS2: :GAL1UAS-Gal1TATA-His3, GAL2UAS-Gal2TATA-Ade URA3: :MEL1UAS-Mel1TATA AUR1-C     | Strain used as negative control for Y2H assay for probing the interactions against Prp5                                        |
| yAAH2331 | MATa, trp1-901, leu2-3, 112, ura3-52, his3-200, gal4Δ, gal80Δ, LUS2: :GAL1UAS-Gal1TATA-His3, GAL2UAS-Gal2TATA-Ade URA3: :MEL1UAS-Mel1TATA AUR1-C     | Strain used to test the interaction between the HSH155 <sup>V502F</sup> allele and Prp5 (AD HSH155 <sup>V502F</sup> ; BD PRP5) |
| yAAH2332 | MATa, trp1-901, leu2-3, 112, ura3-52, his3-200, gal4Δ, gal80Δ, LUS2: :GAL1UAS-Gal1TATA-His3, GAL2UAS-Gal2TATA-Ade URA3: :MEL1UAS-Mel1TATA AUR1-C     | Strain used to test the interaction between the HSH155 <sup>D563G</sup> allele and PRP5 (AD HSH155 <sup>D563G</sup> ; BD PRP5) |
| yAAH2333 | MATa, trp1-901, leu2-3, 112, ura3-52, his3-200, gal4Δ, gal80Δ, LUS2: :GAL1UAS-Gal1TATA-His3, GAL2UAS-Gal2TATA-Ade URA3: :MEL1UAS-Mel1TATA AUR1-C     | Strain used to test the interaction between the HSH155 <sup>E571K</sup> allele and PRP5 (AD HSH155 <sup>E571K</sup> ; BD PRP5) |
| yAAH2335 | MATa, trp1-901, leu2-3, 112, ura3-52, his3-200, gal4Δ, gal80Δ, LUS2: :GAL1UAS-Gal1TATA-His3, GAL2UAS-Gal2TATA-Ade URA3: :MEL1UAS-Mel1TATA AUR1-C     | Used to generate strains for Y2H assay after transformation with pGADT7 Hsh155 mutant plasmids.                                |
| yAAH2336 | MATa, trp1-901, leu2-3, 112, ura3-52, his3-200, gal4Δ, gal80Δ, LUS2: :GAL1UAS-Gal1TATA-His3, GAL2UAS-Gal2TATA-Ade URA3: :MEL1UAS-Mel1TATA AUR1-C     | Strain used to test the interaction between HSH155 WT and PRP3 using Y2H assay (AD HSH155 WT; BD PRP3)                         |
| yAAH2337 | MATa, trp1-901, leu2-3, 112, ura3-52, his3-200, gal4Δ, gal80Δ, LUS2: :GAL1UAS-Gal1TATA-His3, GAL2UAS-Gal2TATA-Ade URA3: :MEL1UAS-Mel1TATA AUR1-C     | Strain used as negative control for Y2H assay for probing the interactions against Prp5 (AD Empty; BD PRP3)                    |
| yAAH2338 | MATa, trp1-901, leu2-3, 112, ura3-52, his3-200, gal4Δ, gal80Δ, LUS2: :GAL1UAS-Gal1TATA-His3, GAL2UAS-Gal2TATA-Ade URA3: :MEL1UAS-Mel1TATA AUR1-C     | Strain used to test the interaction between the HSH155 <sup>V502F</sup> allele and Prp5 (AD HSH155 <sup>V502F</sup> ; BD PRP5) |
| yAAH2339 | MATa, trp1-901, leu2-3, 112, ura3-52, his3-200, gal4Δ, gal80Δ, LUS2: :GAL1UAS-Gal1TATA-His3, GAL2UAS-Gal2TATA-Ade URA3: :MEL1UAS-Mel1TATA AUR1-C     | Strain used to test the interaction between the HSH155 <sup>D563G</sup> allele and PRP5 (AD HSH155 <sup>D563G</sup> ; BD PRP5) |
| yAAH2340 | MATa, trp1-901, leu2-3, 112, ura3-52, his3-200, gal4Δ, gal80Δ, LUS2: :GAL1UAS-Gal1TATA-His3, GAL2UAS-Gal2TATA-Ade URA3: :MEL1UAS-Mel1TATA AUR1-C     | Strain used to test the interaction between the HSH155 <sup>E571K</sup> allele and PRP5 (AD HSH155 <sup>E571K</sup> ; BD PRP5) |
