# Supplementary material for: Impact of cancer-associated mutations in Hsh155/SF3b1 HEAT repeats 9-12 on pre-mRNA splicing in Saccharomyces cerevisiae
Source: PubMed Central journal article supplement (PMC7176370; doi:10.1371/journal.pone.0229315), 2020-04-22
Supplement: pone.0229315.s003.pdf [file pone.0229315.s003.pdf]

**S2 Table. Plasmid used in this study.**

| Plasmid ID | Plasmid Name                         | Description                                                                                                                                      |
|------------|--------------------------------------|--------------------------------------------------------------------------------------------------------------------------------------------------|
| pAAH0403   | pRS414-Hsh155 <sup>WT</sup>          | Plasmid used to generate Hsh155 <sup>WT</sup>                                                                                                    |
| pAAH1077   | pRS414-Hsh155 <sup>V502F</sup>       | Plasmid used to generate Hsh155 <sup>V502F</sup> strain. Cloned using SDM of pAAH0403                                                            |
| pAAH1053   | pRS414-Hsh155 <sup>E529K</sup>       | Plasmid used to generate Hsh155 <sup>E529K</sup> strain. Cloned using SDM of pAAH0403                                                            |
| pAAH1078   | pRS414-Hsh155 <sup>E531K</sup>       | Plasmid used to generate Hsh155 <sup>E531K</sup> strain. Cloned using SDM of pAAH0403                                                            |
| pAAH1037   | pRS414-Hsh155 <sup>D563G</sup>       | Plasmid used to generate Hsh155 <sup>D563G</sup> strain. Cloned using SDM of pAAH0403                                                            |
| pAAH1075   | pRS414-Hsh155 <sup>E571G</sup>       | Plasmid used to generate Hsh155 <sup>E571G</sup> strain. Cloned using SDM of pAAH0403                                                            |
| pAAH1076   | pRS414-Hsh155 <sup>E571K</sup>       | Plasmid used to generate Hsh155 <sup>E571K</sup> strain. Cloned using SDM of pAAH0403                                                            |
| pAAH1079   | pRS414-Hsh155 <sup>I626Q</sup>       | Plasmid used to generate Hsh155 <sup>I626Q</sup> strain. Cloned using SDM of pAAH0403                                                            |
| pAAH0404   | pRS414-Hsh155 <sup>D540G</sup>       | Plasmid used to generate Hsh155 <sup>D540G</sup> strain. Cloned using SDM of pAAH0403                                                            |
| pAAH0405   | pRS414-Hsh155 <sup>H331D</sup>       | Plasmid used to generate Hsh155 <sup>H331D</sup> strain. Cloned using SDM of pAAH0403                                                            |
| pAAH0818   | pRS414-Hsh155 <sup>K740R</sup>       | Plasmid used to generate Hsh155 <sup>K740R</sup> strain. Cloned using SDM of pAAH0403                                                            |
| pAAH0820   | pRS414-Hsh155 <sup>N747A</sup>       | Plasmid used to generate Hsh155 <sup>N747A</sup> strain. Cloned using SDM of pAAH0403                                                            |
| pAAH1098   | pRS414-Hsh155 <sup>H331D/V502F</sup> | Plasmid used to generate Hsh155 <sup>H331D/V502F</sup> strain. Cloned using SDM of pAAH0403                                                      |
| pAAH1099   | pRS414-Hsh155 <sup>D540G/V502F</sup> | Plasmid used to generate Hsh155 <sup>D540G/V502F</sup> strain. Cloned using SDM of pAAH0403                                                      |
| pAAH1100   | pRS414-Hsh155 <sup>K740R/V502F</sup> | Plasmid used to generate Hsh155 <sup>K740R/V502F</sup> strain. Cloned using SDM of pAAH0403                                                      |
| pAAH1101   | pRS414-Hsh155 <sup>N747A/V502F</sup> | Plasmid used to generate Hsh155 <sup>N747A/V502F</sup> strain. Cloned using SDM of pAAH0403                                                      |
| pAAH0470   | ACT1CUP1 WT                          | WT reporter used for ACT1CUP1 assays.                                                                                                            |
| pAAH0524   | ACTCUP1 A258U                        | BS A258U mutant reporter used for ACT1CUP1 assays.                                                                                               |
| pAAH0439   | ACTCUP1 U257C                        | BS U257C mutant reporter used for ACT1CUP1 assays.                                                                                               |
| pAAH0880   | ACTCUP1 BS G                         | BS A259G mutant reporter used for ACT1CUP1 assays.                                                                                               |
|            | pRS415-Prp2 <sup>WT</sup>            | Plasmid used to generate Prp <sup>WT</sup> strains                                                                                               |
| pAAH0790   | pRS415-Prp2 <sup>Q548N</sup>         | Plasmid used to generate Prp2 <sup>Q548N</sup> strains. Cloned using SDM of pRS415-Prp2                                                          |
| pAAH0499   | pGADT7-Hsh155 <sup>WT</sup>          | Plasmid used to generate pGADT7-Hsh155 mutants.                                                                                                  |
| pAAH0485   | pGADT7-Empty                         | Plasmid used to generate control strains for Y2H assay.                                                                                          |
| pAAH1149   | pGADT7-Hsh155 <sup>V502F</sup>       | Plasmid used to generate Prp5 vs Hsh155 <sup>V502F</sup> and Prp3 vs Hsh155 <sup>V502F</sup> strains for Y2H assay. Cloned using SDM of pAAH0499 |
| pAAH1150   | pGADT7-Hsh155 <sup>D563G</sup>       | Plasmid used to generate Prp5 vs Hsh155 <sup>D563G</sup> and Prp3 vs Hsh155 <sup>D563G</sup> strains for Y2H assay. Cloned using SDM of pAAH0499 |
| pAAH1151   | pGADT7-Hsh155 <sup>E571K</sup>       | Plasmid used to generate Prp5 vs Hsh155 <sup>E571K</sup> and Prp3 vs Hsh155 <sup>E571K</sup> strains for Y2H assay. Cloned using SDM of pAAH0499 |
| pAAH1153   | pGBKT7-Prp3                          | Plasmid used to generate Prp3 strains for Y2H assay. Gene insert using                                                                           |
